# Supplementary material
Source: publisher site journal article supplement (https://www.dovepress.com/article/248390)
Supplement: Supplementary file 1 [file get_supplementary_file.php]

**Supplementary Table S1. Proportion of patients for each concomitant csDMARD treatment in PSA and AS cohorts**

| **csDMARD** | **PSA patients, n (%)** | **AS patients, n (%)** |
| --- | --- | --- |
| Azathioprine | 6 (0.3%) | 8 (1.1%) |
| Ciclosporine | 63 (3.4%) | NI |
| Hydroxychloroquine | 25 (1.3%) | 5 (0.7%) |
| Leflunomide | 97 (5.2%) | 6 (0.8%) |
| Methotrexate | 592 (31.9%) | 125 (16.8%) |
| Sulfasalazine | 63 (3.4%) | 65 (8.7%) |

**Notes:** Following the "Opinion 05/2014 on Anonymisation Techniques" drafted by the "European Commission Article 29 Working Party", the analyses involving less than 3 patients were reported NI “not issuable”, as potentially reconductable to single individuals.
